# Supplementary material for: Anionic metal–organic framework as a unique turn-on fluorescent chemical sensor for ultra-sensitive detection of antibiotics
Source: Royal Society of Chemistry journal article supplement (doi:10.1039/d0cc05175f), 2020-01-01
Supplement: d0cc05175f1.pdf [file d0cc05175f1.pdf]

## **Supporting Information**

### **Metal–organic framework (MOF) as a unique turn-on fluorescent chemical sensor for ultra-sensitive detection of antibiotics**

## EXPERIMENTAL SECTION

**Materials and methods.** The reagents and chemicals were commercially available and used without further purification. Elemental analyses were performed by using an elemental analyzer (Elementar Vario EL III analyzer). UV-Vis absorption spectra were performed using a *Jingke L6S* spectrometer. Fourier transform infrared (FT-IR) spectra were carried out with KBr pellets. Thermogravimetric analysis (TGA) was carried out in N<sub>2</sub> atmosphere with a heating rate of 10 °C per minute (NETZSCH STA 449C). The fluorescence spectra were performed with a spectrophotometer (Hitachi F-4500). Powder X-ray diffraction (PXRD) were obtained from an X-ray diffractometer (Bruker D8 ADVANCE) with Cu-K $\alpha$  radiation ( $\lambda = 1.5418 \text{ \AA}$ ). The emission lifetimes were measured on an Edinburgh FLS-920 fluorescence spectrometer.

**Synthesis and preparation of  $\{[\text{Zn}_3(\text{OH})(\text{bmipia})(\text{H}_2\text{O})_3]_4 \cdot [\text{Zn}(\text{H}_2\text{O})_{6.5}]_2\}_n$  (FCS-3).** FCS-3 was synthesized by using a hydrothermal method. A mixture of H<sub>6</sub>bmipia (27 mg), Zn(NO<sub>3</sub>)<sub>2</sub>·6H<sub>2</sub>O (30 mg), NaOH (1 mg) and 10 mL deionized water was sealed in a autoclave and heated for 72 hours at 120 °C, then finally cooled down to room temperature. FCS-3 were obtained by filtration, washing and dried in ambient temperature. Yields: ca. 29% (based on Zn). Elemental analysis (EA) for C<sub>104</sub>N<sub>4</sub>O<sub>77</sub>H<sub>106</sub>Zn<sub>14</sub> (Mr = 3559.10): H 3.00%, C 35.09%, N 1.57%; found: C 35.75%, H 3.51%, N 2.28%. IR (KBr, cm<sup>-1</sup>): 3403(w), 1633(s), 1564(vs), 1378(vs), 1232(w), 1170(w), 1054(w), 992(w), 791(m), 729(m).

**Preparation antibiotics solutions.** Specifically, 36.2 mg of ofloxacin (OFX) was added to 100 mL PBS solution (0.1 M, pH=8) and dissolved with vigorous stirring to obtain antibiotics stock solutions (1 mM).

**Fluorescence properties.** The fluorescence properties of **FCS-3** in aqueous suspension and solid state were performed at room temperature. 20 mg **FCS-3** was solved in deionized water (20 mL) and ultrasonicated for about 30 minutes, finally a stable emulsion was obtained to take the fluorescence measurements. For the fluorescence titration experiment, 2 mL of **FCS-3** emulsion was added into a quartz cuvette and measured in situ with the gradually increase of 1 mM antibiotics.

**X-ray crystallographic study.** By using a diffractometer (Agilent SuperNova), the single crystal X-ray data of **FCS-3** was obtained. With the usage of SHELXL software package, the structure was gotten by direct and developed method with difference Fourier techniques<sup>1</sup>. The location of H atoms attached to C were generated geometrically and all of the non-hydrogen atoms were handled anisotropically. In water molecules, the idealized locations of H atoms were deduced from Fourier difference maps and refined isotropically. The supplementary crystallographic data is presented in CCDC 1997504 for this paper, with a summary given in Table S3.

**Calculation details of LUMO and HOMO of antibiotics.** The LUMO and HOMO of fluoroquinolone antibiotics were calculated with Gaussian 09 software package (Gaussian, Inc., Pittsburgh, PA, 2009) on the Supercomputing Center of FJIRSM, CAS and other data were calculated according to the results reported<sup>2</sup> (Table S2). The geometry structures were optimized by using Density Functional Theory (DFT) method at the M062X/6-31G (d,p) level. The calculation of harmonic frequency was carried out to make sure that the structure obtained is the local minimal.

#### References:

1 G. Sheldrick, *Acta Crystallogr., Sect. A*, 2008, **64**, 112-122.

2 B. Wang, X.-L. Lv, D. Feng, L.-H. Xie, J. Zhang, M. Li, Y. Xie, J.-R. Li and H.-C. Zhou, *J. Am. Chem. Soc.*, 2016, **138**, 6204-6216.

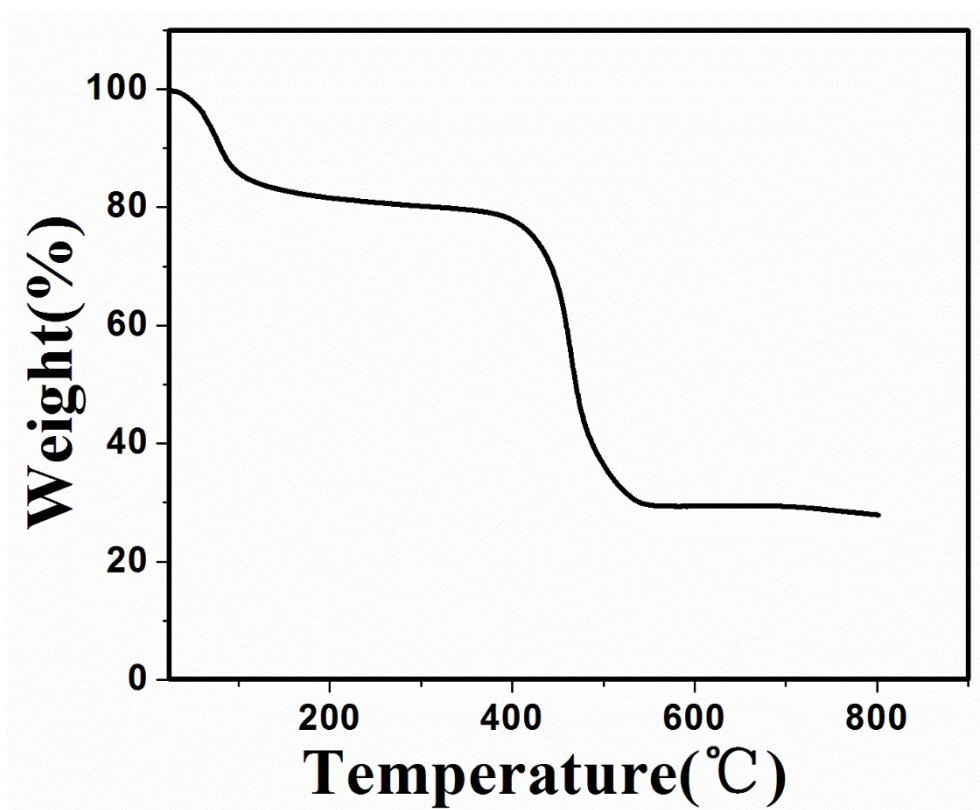

Fig. S1 TGA curve of FCS-3.

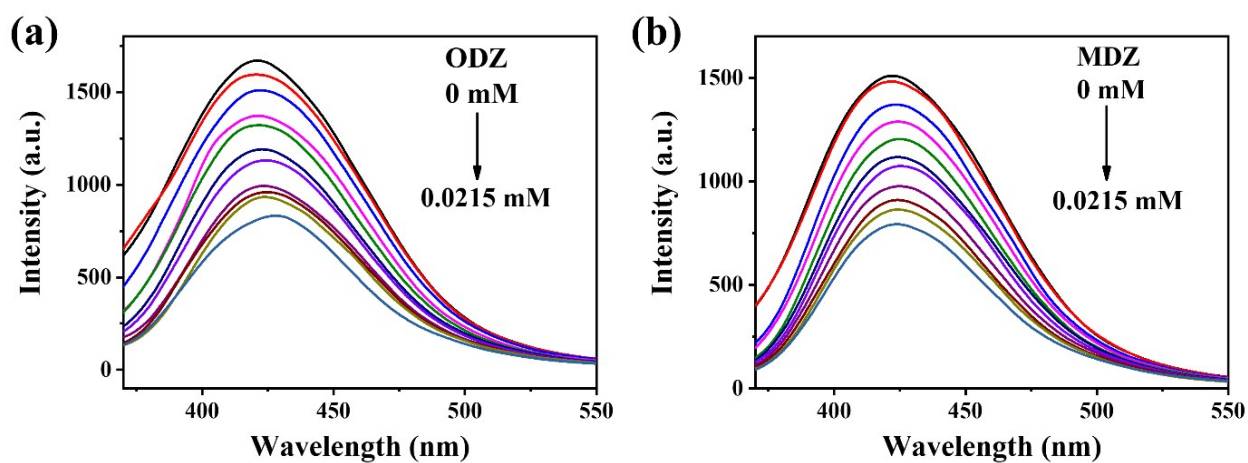

Fig. S2 The emission spectra of FCS-3 in simulated wastewater with (a) ODZ and (b) MDZ.

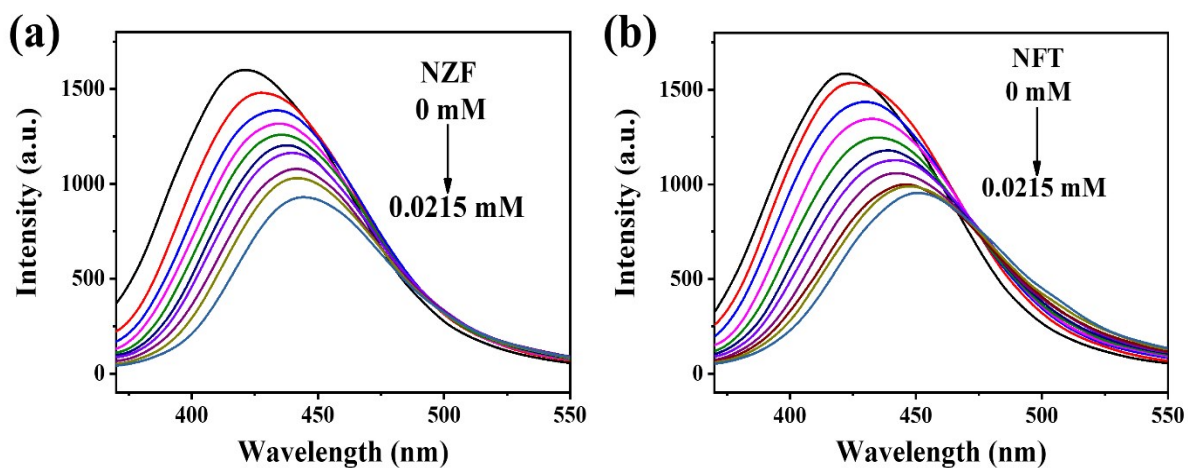

**Fig. S3** The emission spectra of FCS-3 in simulated wastewater with (a) NZF and (b) NFT.

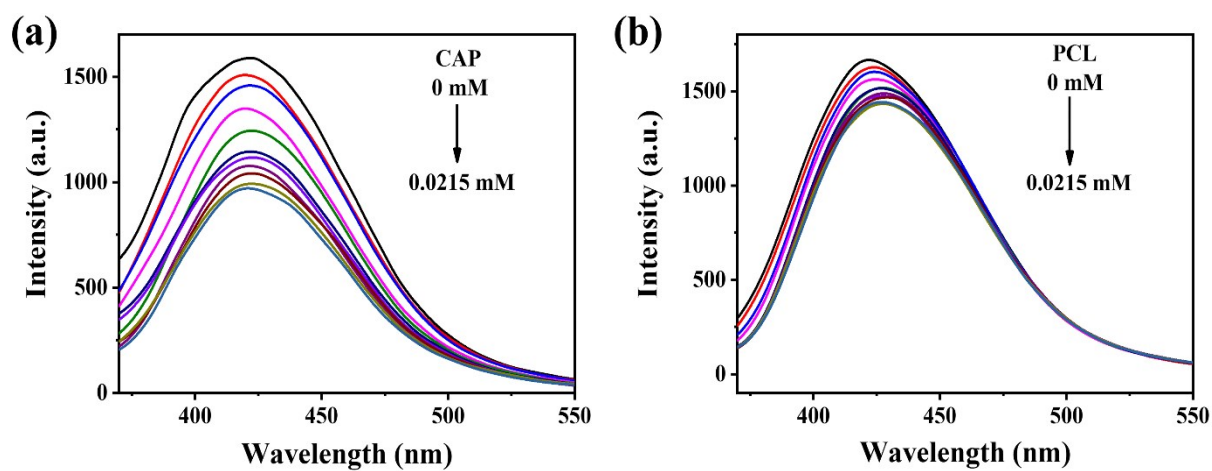

**Fig. S4** The emission spectra of FCS-3 in simulated wastewater with (a) CAP and (b) PCL.

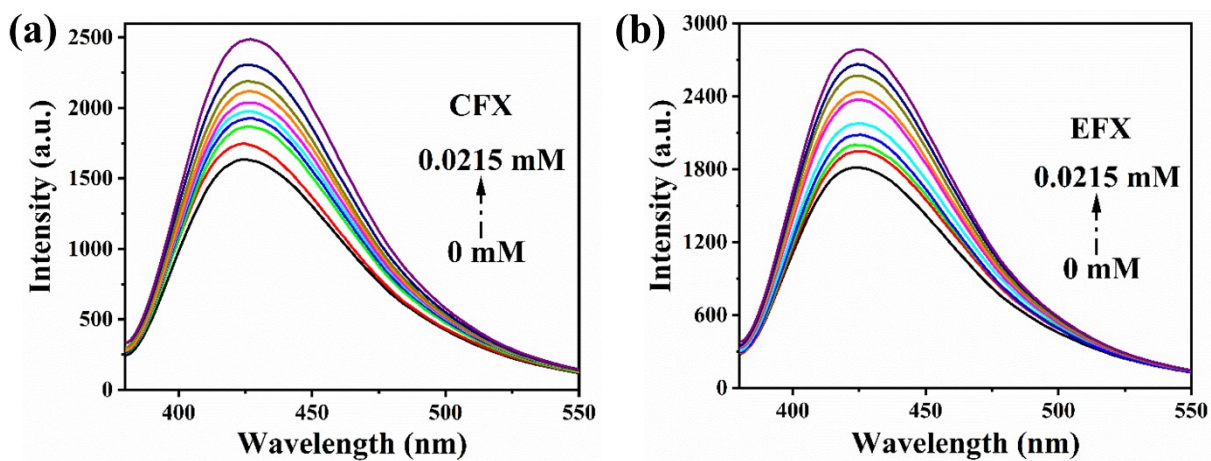

Fig. S5 The emission spectra of FCS-3 in simulated wastewater with (a) CFX and (b) EFX.

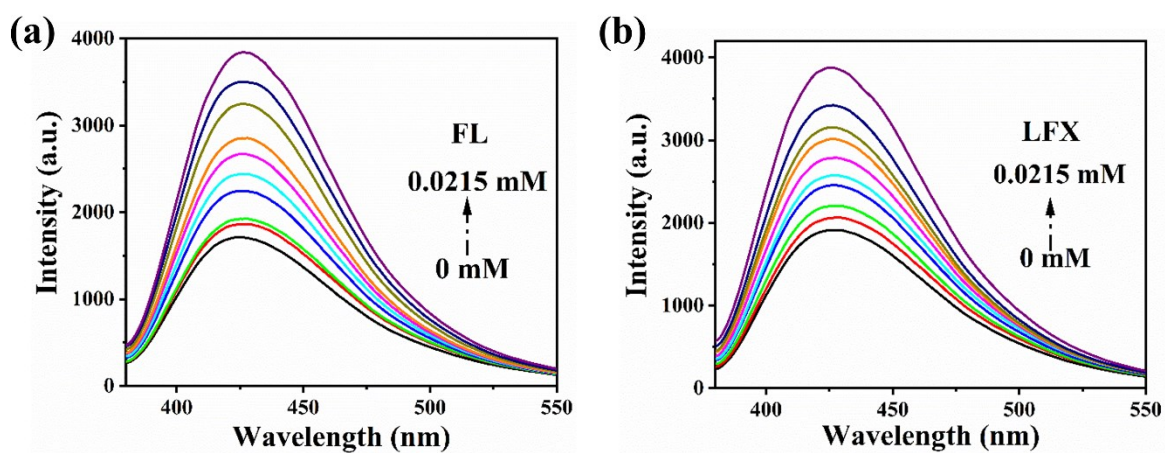

Fig. S6 The emission spectra of FCS-3 in simulated wastewater with (a) FL and (b) LFX.

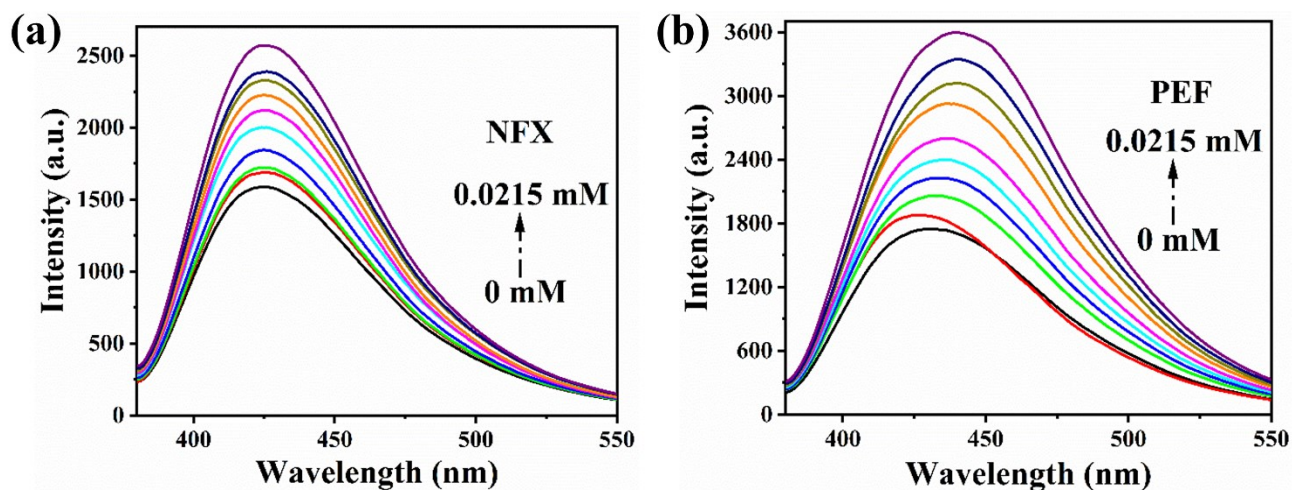

Fig. S7 The emission spectra of FCS-3 in simulated wastewater with (a) NFX and (b) PEF.

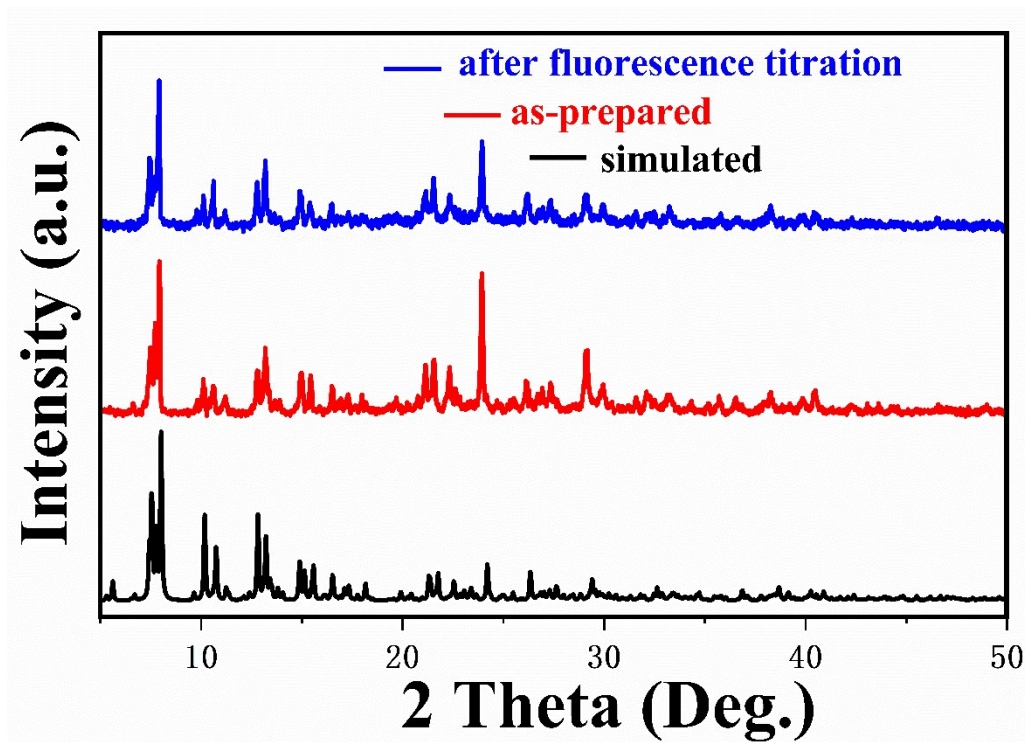

Fig. S8 Simulated and experimental PXRD patterns of FCS-3 before and after the fluorescence titration experiments.

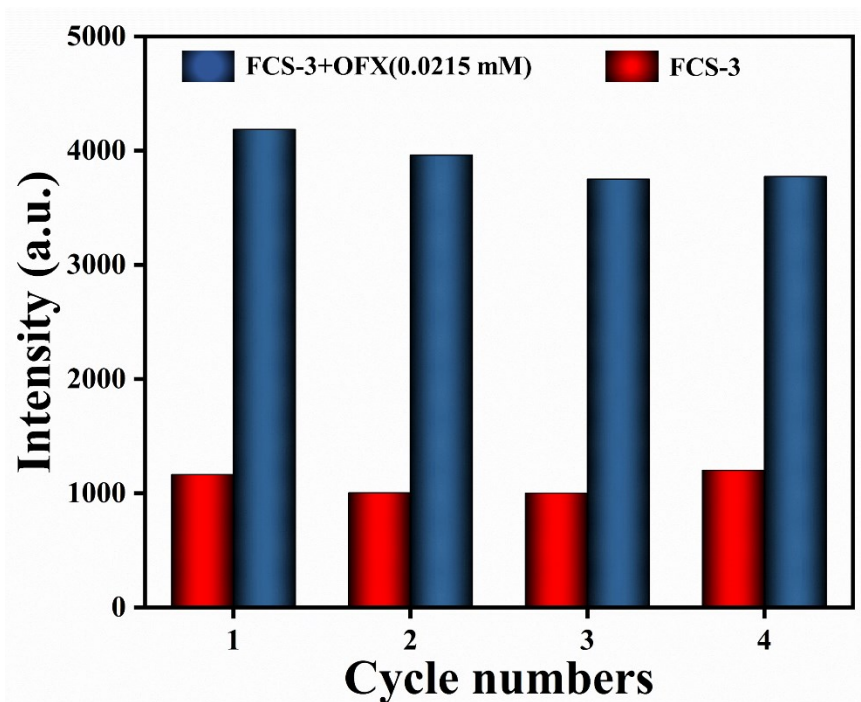

Fig. S9 Recyclability of FCS-3 for the detection of OFX (0.0215 mM).

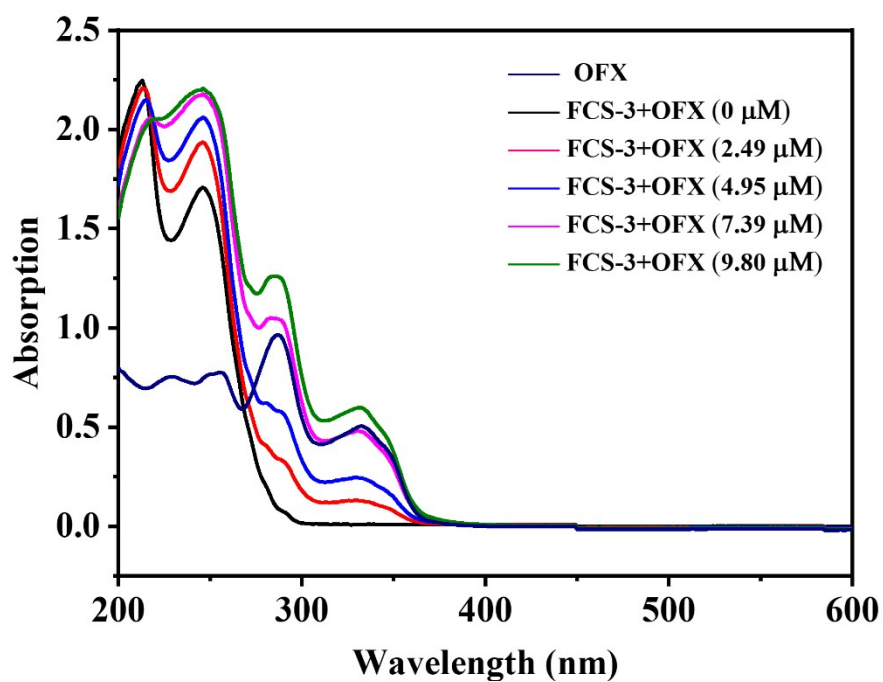

Fig. S10 UV-Vis spectra of FCS-3 before and after the addition of OFX.



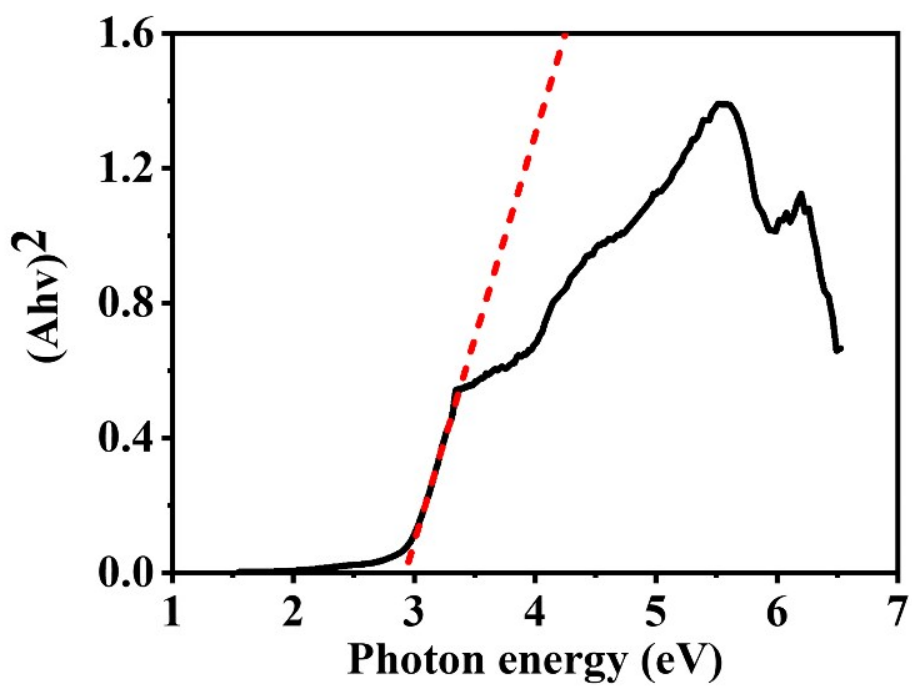

Fig. S11 Kubelka–Munk plot of FCS-3.

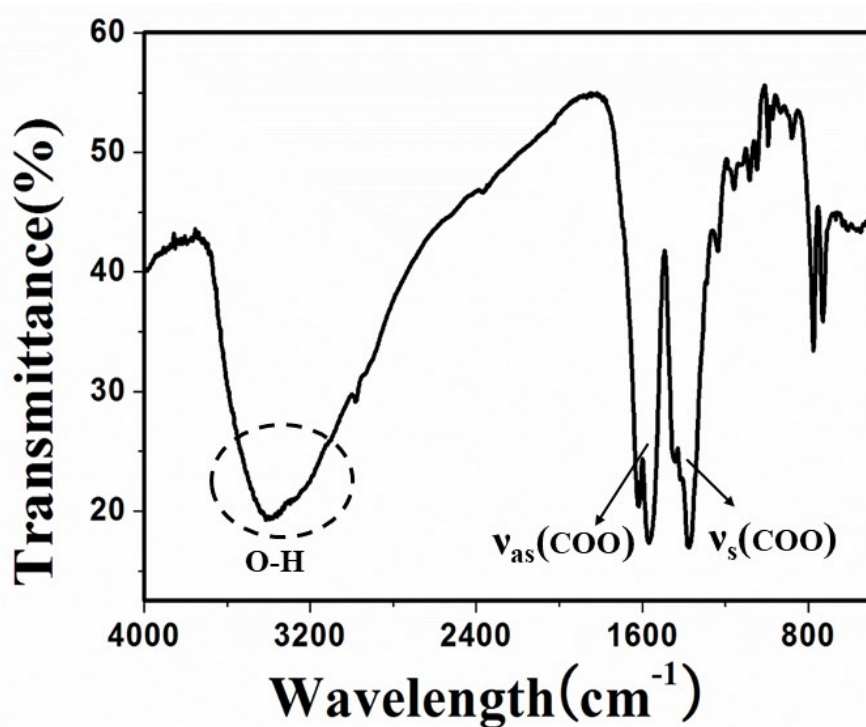

Fig. S12 IR spectrum of FCS-3.

**Table S1.** A comparison of enhancement (quenching) constant of various LMOFs used for detection of antibiotics in literature

| MOF                                                                                                             | Antibiotics used for detection | Detection method | Enhancement (quenching) constant                     | Ref.                                             |
|-----------------------------------------------------------------------------------------------------------------|--------------------------------|------------------|------------------------------------------------------|--------------------------------------------------|
| $\{[\text{Zn}_2(\text{bcob})(\text{OH})(\text{H}_2\text{O})]\cdot\text{DMA}\}_n$                                | tetracycline                   | Turn-off         | $2.7 \times 10^4 \text{ M}^{-1}$                     | ACS Appl. Mater. Interfaces, 2020, 12, 8650-8662 |
| $\text{Zr}_6\text{O}_4(\text{OH})_8(\text{H}_2\text{O})_4(\text{CTTA})_{8/3}$                                   | sulfadiazine                   | Turn-off         | $1.1 \times 10^5 \text{ M}^{-1}$                     | J. Am. Chem. Soc. 2016, 138, 6204-6216           |
| $\{(\text{Me}_2\text{NH}_2)[\text{In}(\text{BCP})]\cdot 2.5\text{DEF}\}_n$                                      | nitrofurazone                  | Turn-off         | $6.38 \times 10^4 \text{ M}^{-1}$                    | Anal. Chem. 2018, 90, 1516-1519                  |
| $\{[\text{Eu}_2(\text{BCA})_3(\text{H}_2\text{O})(\text{DMF})_3]\cdot 0.5\text{DMF}\cdot\text{H}_2\text{O}\}_n$ | nitrofurazone                  | Turn-off         | $2.2 \times 10^4 \text{ M}^{-1}$                     | Chem. Eur. J. 2017, 23, 10293-10300              |
| $[\text{TbL}\cdot 2\text{H}_2\text{O}]_n$                                                                       | nitrofurantoin                 | Turn-off         | $5.26 \times 10^4 \text{ M}^{-1}$                    | Dalton Trans., 2019, 48, 12910-12917             |
| Zn-PDC/Tb <sup>3+</sup>                                                                                         | cefixime                       | Turn-off         | $1.1 \times 10^5 \text{ M}^{-1}$                     | Inorg. Chem. 2018, 57, 3, 1417-1425              |
| <b>FCS-3</b>                                                                                                    | <b>ofloxacin</b>               | <b>Turn-on</b>   | <b><math>1.362 \times 10^5 \text{ M}^{-1}</math></b> | <b>This work</b>                                 |

**Table S2.** HOMO and LUMO energy levels of different antibiotics

| <b>Antibiotics</b> | <b>HOMO (eV)</b> | <b>LUMO (eV)</b> |
|--------------------|------------------|------------------|
| EFX                | -7.07            | -0.29            |
| EL                 | -7.25            | -0.41            |
| CFX                | -7.10            | -0.33            |
| LFX                | -7.15            | -0.34            |
| NFX                | -7.08            | -0.41            |
| OFX                | -7.07            | -0.30            |
| PEF                | -7.06            | -0.28            |
| NZF                | -5.91            | -3.62            |
| NFT                | -6.21            | -3.86            |
| ODZ                | -6.28            | -3.27            |
| MDZ                | -6.42            | -3.43            |
| CAP                | -6.58            | -3.69            |
| PCL                | -5.56            | -1.78            |

**Table S3.** Crystal data and structure refinement of **FCS-3**

|                                                         | <b>FCS-3</b>                                                                      |
|---------------------------------------------------------|-----------------------------------------------------------------------------------|
| <b>Empirical formula</b>                                | C <sub>104</sub> N <sub>4</sub> O <sub>77</sub> H <sub>106</sub> Zn <sub>14</sub> |
| <b>Molecular weight</b>                                 | 3559.10                                                                           |
| <b>Crystal system</b>                                   | Monoclinic                                                                        |
| <b>Space group</b>                                      | <i>P</i> 2 <sub>1</sub> / <i>n</i>                                                |
| <b>a (Å)</b>                                            | 22.1643(14)                                                                       |
| <b>b (Å)</b>                                            | 16.4288(10)                                                                       |
| <b>c (Å)</b>                                            | 23.8287(15)                                                                       |
| <b>α (°)</b>                                            | 90                                                                                |
| <b>β (°)</b>                                            | 93.080(2)                                                                         |
| <b>γ (°)</b>                                            | 90                                                                                |
| <b>V (Å<sup>3</sup>)</b>                                | 8664.3(9)                                                                         |
| <b>Z</b>                                                | 2                                                                                 |
| <b>D<sub>calc</sub> (g·cm<sup>-3</sup>)</b>             | 1.364                                                                             |
| <b>Reflections collected / independent</b>              | 17042/16641                                                                       |
| <b>Goodness-of-fit on F<sup>2</sup></b>                 | 1.070                                                                             |
| <b>R<sub>1</sub><sup>a</sup> indices (I &gt; 2σ(I))</b> | 0.0754                                                                            |
| <b>wR<sub>2</sub><sup>b</sup> indices (all data)</b>    | 0.1998                                                                            |

$${}^a R = \sum ||F_o| - |F_c|| / \sum |F_o|. \quad {}^b wR(F^2) = [\sum w(F_o^2 - F_c^2)^2 / \sum w(F_o^2)^2]^{1/2}.$$
